# Supplementary material for: Dietary-Induced Ketogenesis: Adults Are Not Children
Source: MDPI journal article supplement (doi:10.3390/nu13093093), 2021-09-02
Supplement: s1 [file s1]

Supplementary Material for “Dietary-induced ketogenesis: adults are not children”, by Porper et. al.

|                                                                                                                 |           |
|-----------------------------------------------------------------------------------------------------------------|-----------|
| <i>Figure S1 – The relationship between ketone levels in urine and blood amongst pediatric patients.</i>        | <i>2</i>  |
| <i>Table S1- Ongoing clinical trials using ketogenic diets in various adult conditions</i>                      | <i>3</i>  |
| <i>Table S2 - Variations of the Ketogenic diet used in our research:</i>                                        | <i>12</i> |
| <i>Table SA- Baseline Demographics of adult population:</i>                                                     | <i>13</i> |
| <i>Table SB - Baseline Demographics of children population:</i>                                                 | <i>14</i> |
| <i>Table S4- Dietary intake of the two populations prior to and during diet intervention:</i>                   | <i>15</i> |
| <i>Table S5: Anthropometric and metabolic parameters at baseline (week 0) and during treatment (weeks 2-4).</i> | <i>16</i> |
| <i>Table S6.A- Clinical experience of dietary ketogenesis in healthy adults</i>                                 | <i>17</i> |
| <i>Table S6.B- Clinical experience of dietary ketogenesis in adults with epilepsy or diabetes</i>               | <i>18</i> |
| <i>Table S6.C-Clinical experience of dietary ketogenesis in adults with cancer</i>                              | <i>19</i> |
| <i>Table S6.D- Preclinical studies of dietary/fasting ketogenesis in young vs adult rats</i>                    | <i>20</i> |
| <i>References for supplementary material</i>                                                                    | <i>21</i> |

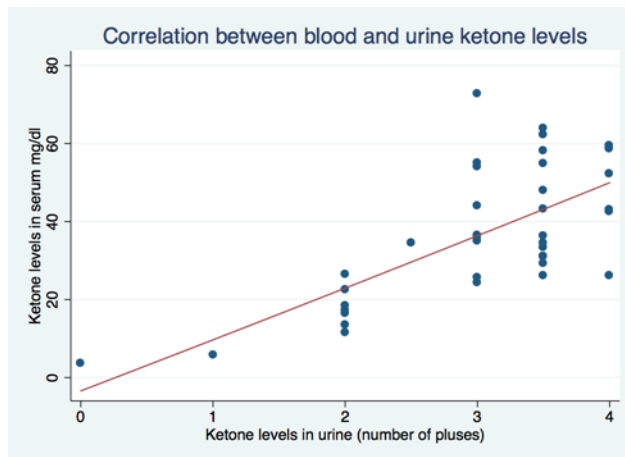

Figure S1 – The relationship between ketone levels in urine and blood amongst pediatric patients.

The scatter plot demonstrates datapoints from the study during which ketone levels were measured concurrently in both venous blood and urine. The data was used to construct a regression line in order to estimate blood ketone levels for those timepoints for which only urine measurements were available.

Table S1- Ongoing clinical trials using ketogenic diets in various adult conditions

| NCT Number  | Conditions                                                                                           | Interventions                                                                                                                                          |
|-------------|------------------------------------------------------------------------------------------------------|--------------------------------------------------------------------------------------------------------------------------------------------------------|
| NCT03433261 | CNS Oxygen Toxicity, Ketogenic Diet                                                                  | Dietary Supplement: Ketogenic Diet                                                                                                                     |
| NCT03775252 | Migraine Disorders                                                                                   | Dietary Supplement: Ketogenic diet                                                                                                                     |
| NCT04165707 | Overweight and Obesity Ketogenic Diet                                                                | Device: Keyto device + app Other: Weight Watchers app                                                                                                  |
| NCT00575146 | Recurrent Glioblastoma                                                                               | Dietary Supplement: TAVARLIN                                                                                                                           |
| NCT03244735 | Chronic Cluster Headache                                                                             | Other: Atkins diet                                                                                                                                     |
| NCT01865162 | Glioblastoma Multiforme                                                                              | Other: ketogenic diet                                                                                                                                  |
| NCT01997749 | Acute Stroke                                                                                         | Dietary Supplement: Ketocal 4:1 (Nutricia) Dietary Supplement: Control diet: Regular diet offered at the hospitals Dietary Supplement: Ketogenic meals |
| NCT02763553 | Ketosis                                                                                              | Dietary Supplement: Ketogenic Feed Dietary Supplement: Standard Feed                                                                                   |
| NCT03285152 | Endometrial Cancer                                                                                   | Other: Ketogenic Diet (KD) Other: Standard Diet (SD)                                                                                                   |
| NCT02983942 | Primary Central Nervous System Lymphoma                                                              | Dietary Supplement: ketogenic diet Dietary Supplement: Routine diet                                                                                    |
| NCT04791787 | Glucose Metabolism Disorders (Including Diabetes Mellitus) Energy Supply; Deficiency Type 2 Diabetes | Other: Standard weight maintaining diet Other: Weight maintaining isocaloric ketogenic diet Dietary Supplement: Beta-hydroxy butyrate                  |
| NCT01016522 | Amyotrophic Lateral Sclerosis                                                                        | Dietary Supplement: KetoCal                                                                                                                            |
| NCT03255031 | Alcoholism                                                                                           | Other: Ketogenic Diet (KD) / Standard American (SA) Snacks and Shakes                                                                                  |
| NCT03076060 | Migraine Overweight and Obesity                                                                      | Behavioral: Ketogenic diet Behavioral: Sham Diet                                                                                                       |
| NCT02516501 | Neoplasms                                                                                            | Dietary Supplement: MyAmino Dietary Supplement: betaquik Radiation: Radio(chemo)therapy                                                                |
| NCT04530032 | Traumatic Brain Injury                                                                               | Other: ketogenic diet Other: Standard diet                                                                                                             |
| NCT04615975 | Covid19                                                                                              | Dietary Supplement: Ketogenic diet with phytoextracts                                                                                                  |
| NCT01906398 | Epilepsy                                                                                             | Other: ketogenic diet                                                                                                                                  |

|             |                                                                                                                  |                                                                                                     |
|-------------|------------------------------------------------------------------------------------------------------------------|-----------------------------------------------------------------------------------------------------|
| NCT03873922 | Psychosis;<br>Acute   Psychosis   Psychotic Disorders   Schizophrenia                                            | Other: Ketogenic diet intervention                                                                  |
| NCT02069197 | Obesity   Diabetes   Obstructive Sleep Apnea                                                                     | Other: Ketogenic diet   Drug: Orlistat   Other: Standardized diet                                   |
| NCT01975766 | Head and Neck Neoplasms                                                                                          | Dietary Supplement: Ketogenic diet   Device: External beam radiation therapy                        |
| NCT04108819 | Obesity Hypoventilation Syndrome   Ketogenic Dieting   Hypercapnic Respiratory Failure                           | Dietary Supplement: Ketogenic Diet                                                                  |
| NCT01796574 | Status Epilepticus   Seizure   Epilepsy   Refractory Status Epilepticus   Medically Resistant Status Epilepticus | Dietary Supplement: Ketogenic diet                                                                  |
| NCT04316520 | Metastatic Renal Cancer                                                                                          | Dietary Supplement: Ketogenic diet                                                                  |
| NCT04322110 | Liver Fat                                                                                                        | Other: Pronokal Method   Other: Low calorie diet                                                    |
| NCT03451799 | GBM   Glioblastoma                                                                                               | Other: Ketogenic Diet   Radiation: Standard-of-care radiation   Drug: Standard-of-care Temozolomide |
| NCT01419483 | Pancreatic Neoplasms                                                                                             | Dietary Supplement: Ketogenic diet                                                                  |
| NCT02302235 | Glioblastoma Multiforme of Brain                                                                                 | Other: Ketogenic Diet   Other: Standardized Diet                                                    |
| NCT03955068 | Recurrent Brain Tumor, Childhood   Ketogenic Diet                                                                | Other: Strict Classic Ketogenic Diet                                                                |
| NCT03982602 | Traumatic Brain Injury   Ketogenic Dieting                                                                       | Drug: Ketogenic diet                                                                                |
| NCT04701957 | Alzheimer Disease, Early Onset                                                                                   | Behavioral: Ketogenic diet                                                                          |
| NCT03991897 | Lymphedema   Ketogenic Dieting                                                                                   | Dietary Supplement: Ketogenic diet   Dietary Supplement: Isocaloric diet                            |
| NCT04292938 | Glycogen Storage Disease                                                                                         | Dietary Supplement: Low carbohydrate ketogenic diet                                                 |
| NCT02939378 | Glioblastoma Multiforme                                                                                          | Dietary Supplement: Ketogenic diet   Dietary Supplement: Standard diet                              |
| NCT04235699 | Heart Failure With Preserved Ejection Fraction                                                                   | Other: Nutritional and Dietary Manipulation                                                         |
| NCT03859245 | Diabetic Retinopathy (DR)   Age-related Macular Degeneration (AMD)   Mid-peripheral Drusen                       | Behavioral: Photobiomodulation   Behavioral: Ketogenic diet                                         |

|             |                                                                           |                                                                                                                                                                      |
|-------------|---------------------------------------------------------------------------|----------------------------------------------------------------------------------------------------------------------------------------------------------------------|
|             | Formation Diabetic Macular Edema (DME)                                    |                                                                                                                                                                      |
| NCT01419587 | Carcinoma, Non-Small-Cell Lung                                            | Dietary Supplement: Ketogenic diet                                                                                                                                   |
| NCT01754350 | Recurrent Glioblastoma                                                    | Dietary Supplement: calorie-restricted ketogenic diet and transient fasting Dietary Supplement: standard nutrition                                                   |
| NCT01364545 | Parkinson's Disease                                                       | Dietary Supplement: Ketone ester drink Dietary Supplement: Placebo (carbohydrate containing) drink                                                                   |
| NCT03843606 | McArdle Disease                                                           | Other: Modified ketogenic diets                                                                                                                                      |
| NCT04044508 | McArdle Disease                                                           | Dietary Supplement: Ketocal 4:1 liquid Nutricia (intervention) Dietary Supplement: Fortini multifibre Nutrica (placebo)                                              |
| NCT03535701 | Stage IV Breast Cancer AJCC v6 and v7                                     | Dietary Supplement: Dietary Intervention Other: Laboratory Biomarker Analysis Drug: Paclitaxel Other: Quality-of-Life Assessment Other: Questionnaire Administration |
| NCT02046187 | Glioblastoma (GBM)                                                        | Dietary Supplement: Ketogenic Diet Radiation: Radiation therapy Drug: Temozolomide                                                                                   |
| NCT04231734 | Mantle Cell Lymphoma Ketogenic Dieting                                    | Other: Ketogenic Diet                                                                                                                                                |
| NCT03901014 | Cholesterol Metabolism Ketone Metabolism                                  | Other: Standard American diet Other: Very low carbohydrate diet                                                                                                      |
| NCT04714541 | Anorexia Nervosa                                                          | Drug: Ketamine Hcl 50Mg/ML Inj                                                                                                                                       |
| NCT03691558 | Ketogenic Dieting Physical Activity                                       | Other: Ketogenic diet Other: Western Diet                                                                                                                            |
| NCT04750941 | Follicular Lymphoma Endometrial Cancer                                    | Drug: Copanlisib Other: Ketogenic Diet                                                                                                                               |
| NCT04382183 | Obesity                                                                   | Behavioral: Ketogenic weight loss maintenance diet Behavioral: Isocaloric balanced weight loss maintenance diet                                                      |
| NCT03791242 | Obstructed Sleep Apnea Syndrome in Patient Candidate to Bariatric Surgery | Device: Cpap and ketogenic diet                                                                                                                                      |
| NCT04691960 | Glioblastoma                                                              | Other: Ketogenic Diet Drug: Metformin                                                                                                                                |
| NCT04629365 | Diet, Healthy Body Weight                                                 | Other: Ketogenic Diet Other: Normal Diet                                                                                                                             |
| NCT04396015 | Cognitive Function 1, Social                                              | Dietary Supplement: Bulletproof Brain Octane Dietary Supplement: Placebo                                                                                             |

|             |                                                                                                                                                                               |                                                                                                                                                               |
|-------------|-------------------------------------------------------------------------------------------------------------------------------------------------------------------------------|---------------------------------------------------------------------------------------------------------------------------------------------------------------|
| NCT04383951 | NASH - Nonalcoholic Steatohepatitis   Cirrhosis, Liver                                                                                                                        | Other: Dietary consult for participants in the ketogenic diet arm   Other: Dietary consult for participants in the standard of care arm                       |
| NCT04801173 | PCOS   Obesity   Insulin Resistance                                                                                                                                           | Combination Product: Very low calorie ketogenic diet   Behavioral: Low calorie standard diet                                                                  |
| NCT03962647 | Estrogen Receptor-positive Breast Cancer                                                                                                                                      | Dietary Supplement: 2-Week Ketogenic Diet   Drug: Letrozole                                                                                                   |
| NCT03278249 | Glioblastoma                                                                                                                                                                  | Other: Modified Atkins Ketogenic Diet                                                                                                                         |
| NCT04019431 | Obesity                                                                                                                                                                       | Dietary Supplement: Whey protein, vegetable protein or animal protein                                                                                         |
| NCT03935854 | Obesity   Ketogenic Dieting   Metabolic Syndrome   Bipolar Disorder   Schizophrenia   Weight Gain   Psychotropic Drug, Unspecified Causing Adverse Effects in Therapeutic Use | Other: LCHF, Ketogenic Diet                                                                                                                                   |
| NCT00498394 | Obesity                                                                                                                                                                       | Behavioral: Clinical diet trial                                                                                                                               |
| NCT03338452 | Obesity                                                                                                                                                                       | Behavioral: Low energy ketogenic diet                                                                                                                         |
| NCT00108524 | Diabetes Mellitus   Obesity                                                                                                                                                   | Behavioral: Low carbohydrate ketogenic diet   Drug: Orlistat   Behavioral: Low-fat diet                                                                       |
| NCT00188500 | Epilepsy                                                                                                                                                                      | Behavioral: atkins diet   Behavioral: ability to follow low carbohydrate diet                                                                                 |
| NCT04078971 | Athletic Performance                                                                                                                                                          | Other: Western diet   Other: ketogenic diet                                                                                                                   |
| NCT03690193 | Alzheimer Disease                                                                                                                                                             | Behavioral: Ketogenic Diet                                                                                                                                    |
| NCT03509571 | Spinal Cord Injuries                                                                                                                                                          | Other: Ketogenic Diet   Other: Standard Diet                                                                                                                  |
| NCT04163120 | Polycystic Ovary Syndrome                                                                                                                                                     | Other: Low calorie Mediterranean ketogenic diet with phytoextracts (KEMEPHY)                                                                                  |
| NCT04705558 | PreDiabetes                                                                                                                                                                   | Other: continuous moderate intensity aerobic training   Other: ketogenic diet                                                                                 |
| NCT03160599 | Malignant Tumors                                                                                                                                                              | Other: ketogenic diet                                                                                                                                         |
| NCT04019730 | Upper Respiratory Tract Infections                                                                                                                                            | Other: diet                                                                                                                                                   |
| NCT02417350 | Healthy                                                                                                                                                                       | Other: Ketogenic diet for four weeks, then a 15-week washout, and finally a NFA recommended diet for four weeks   Other: NFA recommended diet for four weeks, |

|             |                                                                                         |                                                                                                                                       |
|-------------|-----------------------------------------------------------------------------------------|---------------------------------------------------------------------------------------------------------------------------------------|
|             |                                                                                         | then a 15 week washout, and finally a ketogenic diet for four weeks.                                                                  |
| NCT03075514 | Glioblastoma   Glioblastoma Multiforme   Glioblastoma, Adult                            | Other: MKD   Other: MCT                                                                                                               |
| NCT03196271 | Intractable Epilepsy                                                                    | Dietary Supplement: Ketocal 2.5:1                                                                                                     |
| NCT03328858 | Brain Tumors                                                                            | Other: Ketogenic Diet                                                                                                                 |
| NCT01716468 | Cancer                                                                                  | Other: Ketogenic Diet                                                                                                                 |
| NCT02497105 | Epilepsy                                                                                | Other: Ketogenic Diet                                                                                                                 |
| NCT02477904 | Autism Spectrum Disorder                                                                | Other: Ketogenic Diet                                                                                                                 |
| NCT03784716 | Fatty Liver, Nonalcoholic   Liver Diseases                                              | Other: Ketogenic Diet   Other: Standard Weight Loss Diet                                                                              |
| NCT03031028 | Refractory Epilepsy                                                                     | Other: ketogenic diet                                                                                                                 |
| NCT04175964 | Polycystic Ovary Syndrome                                                               | Behavioral: ketogenic diet   Combination Product: caloric diet with Metformin   Behavioral: caloric diet                              |
| NCT04631445 | Metastatic Pancreatic Ductal Adenocarcinoma                                             | Other: Ketogenic Diet                                                                                                                 |
| NCT02644239 | Epilepsy   Cardiovascular Disease   Non-alcoholic Fatty Liver Disease   Quality of Life | Dietary Supplement: ketogenic diet                                                                                                    |
| NCT02835820 | HIV   Neurocognitive Impairment                                                         | Dietary Supplement: Ketogenic Diet                                                                                                    |
| NCT03301532 | GLUT1DS1                                                                                | Drug: Triheptanoin                                                                                                                    |
| NCT03652649 | Type2 Diabetes Mellitus   Obesity                                                       | Other: 3:1 ratio Ketogenic diet                                                                                                       |
| NCT04086498 | Overweight   Mood   Appetitive Behavior                                                 | Other: Mediterranean diet   Other: KEMEPHY   Other: KD                                                                                |
| NCT04492228 | Covid19   Ketogenic Dieting                                                             | Other: Ketogenic diet                                                                                                                 |
| NCT01538355 | Relapsing-Remitting Multiple Sclerosis                                                  | Other: Prolonged Fasting   Other: Ketogenic low glycemic load treatment   Other: Control diet                                         |
| NCT03114176 | Overweight and Obesity   Exertion; Excess   Oxygen Toxicity                             | Dietary Supplement: Ketogenic Diet                                                                                                    |
| NCT00476125 | Metabolic Regulation   Fasting   Ketogenic Diet                                         | Behavioral: Dietary manipulation ketogenic diet   Behavioral: Dietary Manipulation - 12 day ketogenic diet   Behavioral: 16 Hour Fast |
| NCT01092247 | Malignant Tumors                                                                        | Other: Nutritional support with Standard diet   Other: Nutritional intervention with the Ketogenic diet                               |

|             |                                                                                                               |                                                                                                                                           |
|-------------|---------------------------------------------------------------------------------------------------------------|-------------------------------------------------------------------------------------------------------------------------------------------|
| NCT02744079 | Breast Neoplasms                                                                                              | Behavioral: Low carbohydrate diet  Behavioral: Low fat diet                                                                               |
| NCT04083352 | PTSD  Ketosis                                                                                                 | Dietary Supplement: Pruvit Ketomax Ketone Salt  Dietary Supplement: Placebo                                                               |
| NCT04308577 | Brain Injuries  Traumatic Brain Injury  Subarachnoid Hemorrhage  Stroke  Anoxic Brain Injury  Neuroinfections | Other: Ketogenic diet with added MCT                                                                                                      |
| NCT03530501 | Weight Loss  Inflammation                                                                                     | Other: Diet  Dietary Supplement: Synbiotic1  Dietary Supplement: Synbiotic2                                                               |
| NCT00415688 | Type 2 Diabetes Mellitus  Overweight  Obesity                                                                 | Behavioral: Low carbohydrate, ketogenic diet  Behavioral: Low glycemic index, reduced calorie diet                                        |
| NCT01235208 | Overweight  Obesity  Metabolic Syndrome                                                                       | Other: The "Dr. Fedon Lindbergs Vektcoach" Treatment                                                                                      |
| NCT04646733 | Weight Loss  Body Composition                                                                                 | Other: High Protein Diet Group  Other: No High Protein Diet Group                                                                         |
| NCT03202108 | Ketogenic Dieting  Epilepsy  Glucose Transporter Type 1 Deficiency Syndrome                                   | Dietary Supplement: Krio                                                                                                                  |
| NCT02915211 | Intractable Epilepsy  Glucose Transporter Type 1 Deficiency Syndrome  Ketogenic Dieting                       | Dietary Supplement: Keyo                                                                                                                  |
| NCT03014752 | Epilepsy Intractable                                                                                          | Other: Classical ketogenic diet  Other: Modified Atkins diet                                                                              |
| NCT04399954 | Epilepsy Intractable  Glucose Transporter Type 1 Deficiency Syndrome  Ketogenic Dieting                       | Dietary Supplement: Ketoflo                                                                                                               |
| NCT01983163 | Epilepsy                                                                                                      | Other: Ketogenic diet (2.5 to 4:1)  Other: Modified Atkin's diet                                                                          |
| NCT02092753 | Quality of Life                                                                                               | Other: Standard diet (SD)  Other: Experimental 1: Ketogenic diet (KD).  Other: Experimental 2: "Low glycemic and insulinemic" diet (LOGI) |
| NCT04461938 | Glioma, Mixed                                                                                                 | Other: Fasting                                                                                                                            |
| NCT03785808 | Diet Modification  Lung Cancer                                                                                | Behavioral: Special Diet Therapy (low-carb)  Behavioral: Special Diet Therapy (low-fat)  Behavioral: Special Diet Therapy (USDA control)  |
| NCT03171506 | Ovarian Cancer  Endometrial Cancer                                                                            | Other: Ketogenic diet  Other: AND diet                                                                                                    |



|             |                                                                                                                                                                       |                                                                                                                     |
|-------------|-----------------------------------------------------------------------------------------------------------------------------------------------------------------------|---------------------------------------------------------------------------------------------------------------------|
| NCT01535911 | Glioblastoma                                                                                                                                                          | Other: Energy restricted Ketogenic Diet (ERKD) (Metabolic Nutritional Therapy)                                      |
| NCT04309149 | Ketosis   Epilepsy   Ketogenic Diet   Fatty Acid Oxidation Disorder   Malabsorption                                                                                   | Dietary Supplement: MCT fats                                                                                        |
| NCT02216500 | Seizures                                                                                                                                                              | Dietary Supplement: Ketogenic Therapy                                                                               |
| NCT03810378 | Diabetes Mellitus, Type 2   PreDiabetes                                                                                                                               | Behavioral: Mediterranean Diet (Med-Plus)   Behavioral: Well-Formulated Ketogenic Diet (WFKD)                       |
| NCT04309214 | Ketosis   Epilepsy   Fatty Acid Oxidation Disorder   Malabsorption   Ketogenic Diet   Medium Chain Triglycerides                                                      | Dietary Supplement: MCT fats                                                                                        |
| NCT04195594 | Ketogenic Dieting   Healthy                                                                                                                                           | Other: Nic's Keto Diet                                                                                              |
| NCT02286167 | Glioblastoma Multiforme                                                                                                                                               | Other: Diet modification                                                                                            |
| NCT04705298 | Drug Resistant Epilepsy                                                                                                                                               | Dietary Supplement: Prebiotic   Dietary Supplement: Placebo                                                         |
| NCT04584346 | Parkinson's Disease                                                                                                                                                   | Dietary Supplement: Liquigen MCT oil                                                                                |
| NCT02409784 | Healthy                                                                                                                                                               | Dietary Supplement: Pre-KD   Dietary Supplement: Post-KD                                                            |
| NCT04744558 | Ketogenic Dieting                                                                                                                                                     | Other: Low carb high fat ketogenic dieting   Other: Low carb high fat non-ketogenic dieting                         |
| NCT04943926 | Diabetes Mellitus, Type 2   Overweight and Obesity   Hypertension   Glucose Intolerance   Insulin Resistance   Dyslipidemia Associated With Type II Diabetes Mellitus | Other: Energy restricted diet   Other: Low carbohydrate high fat diet                                               |
| NCT01820663 | Stroke   Ischemic Stroke                                                                                                                                              | Other: Modified Atkins Diet   Other: Control diet                                                                   |
| NCT01278966 | Epilepsy                                                                                                                                                              | Other: The Modified Atkins Diet                                                                                     |
| NCT03665948 | Nutrition   Ketogenic Dieting   Low Glycemic Index Diet   Sport   Crossfit                                                                                            | Other: Dietary Intervention - Ketogenic Diet (KD)   Other: Dietary Intervention - Low-Glycemic Index Diet (CHO-LGI) |
| NCT04730869 | Glioblastoma Multiforme                                                                                                                                               | Other: Standard Treatment Plus Metabolic Therapy Program                                                            |
| NCT04680780 | ADPKD                                                                                                                                                                 | Other: Ketogenic diet   Other: 3-days water-fasting   Other: Control                                                |
| NCT03394664 | Obesity                                                                                                                                                               | Behavioral: Feeding Study                                                                                           |

|             |                                                                                                |                                                                                                                                                                                                          |
|-------------|------------------------------------------------------------------------------------------------|----------------------------------------------------------------------------------------------------------------------------------------------------------------------------------------------------------|
| NCT04260542 | Insulin Resistance Obesity                                                                     | Behavioral: Fasting/refeeding Behavioral: Ketogenic diet/ fasting                                                                                                                                        |
| NCT04472624 | ADPKD                                                                                          | Other: Fasting Other: Ketogenic diet                                                                                                                                                                     |
| NCT01311440 | Epilepsy Focal Epilepsy Generalized Epilepsy                                                   | Other: Modified Atkins diet treatment                                                                                                                                                                    |
| NCT04358835 | COVID-19                                                                                       | Dietary Supplement: Ketogenic diet Other: standard of care                                                                                                                                               |
| NCT03679260 | Prostate Cancer                                                                                | Other: Carbohydrate restricted diet Other: Non-restricted diet Other: Phone counseling with dietitian                                                                                                    |
| NCT02426047 | Epilepsy Seizure Catamenial Epilepsy Medically Resistant Epilepsy Medically Resistant Seizures | Dietary Supplement: betaquik <sup>®</sup>                                                                                                                                                                |
| NCT04920058 | Metabolic Syndrome                                                                             | Device: Continuous Glucose Monitor Other: <Active Comparator?>                                                                                                                                           |
| NCT03319173 | Mild Cognitive Impairment Metabolic Syndrome                                                   | Behavioral: Dietary intervention                                                                                                                                                                         |
| NCT02944253 | Obesity                                                                                        | Other: Low energy diet 70 gram carbohydrates Other: Low energy diet 100 gram carbohydrates Other: Low energy diet 130 gram carbohydrates                                                                 |
| NCT03934476 | Obesity Diet Modification                                                                      | Behavioral: Ketogenic diet Behavioral: Exercise HIIT                                                                                                                                                     |
| NCT03998878 | Obesity                                                                                        | Behavioral: Low-Carbohydrate Diet Behavioral: Intermittent Energy Restriction Behavioral: Hunger Training                                                                                                |
| NCT03710928 | Type1diabetes                                                                                  | Other: very low carbohydrate diet Other: standard carbohydrate diet                                                                                                                                      |
| NCT04200391 | Type1diabetes                                                                                  | Other: Very low carbohydrate diet                                                                                                                                                                        |
| NCT04219709 | Type1diabetes                                                                                  | Other: Very low carbohydrate diet Other: Standard carbohydrate diet                                                                                                                                      |
| NCT04678713 | Obesity                                                                                        | Dietary Supplement: investigate the nutritional determinants of MFO in moderate to well-train individuals Other: Investigate the physiological determinants of MFO in moderate to well-train individuals |
| NCT03231514 | Ketogenic Dieting                                                                              | Dietary Supplement: Carbohydrate Supplement (Carb10) Other: Diet Other: Exercise                                                                                                                         |

|             |                                                 |                                                          |
|-------------|-------------------------------------------------|----------------------------------------------------------|
| NCT02984540 | Mild Cognitive Impairment Insulin Resistance    | Other: Low-Carbohydrate Diet Other: Low-Fat Diet         |
| NCT02825758 | Deficiency of Micronutrients                    | Dietary Supplement: ZestiVits                            |
| NCT03878225 | Alcohol Use Disorder Alcohol Withdrawal Ketosis | Dietary Supplement: H.V.M.N. Ketone Ester Other: Placebo |

Table S2 - Variations of the Ketogenic diet used in our research:

| Diet *                                                  | Composition (%)**                            | Principles                                                                                                                                                                                       | Meal example                                                                                                                          |
|---------------------------------------------------------|----------------------------------------------|--------------------------------------------------------------------------------------------------------------------------------------------------------------------------------------------------|---------------------------------------------------------------------------------------------------------------------------------------|
| Classic ketogenic diet<br><br>Wilder, 1921<br><br>[1,2] | 90% fat,<br>8% protein,<br>2% carbohydrate.  | A strict ratio, based on mass, between fat to both protein and carbohydrates (3: 1, 4: 1 respectively.<br><br>Requires hospitalization to initiate the diet, and weighing individual food items. | 30 g egg,<br>15 g cheese<br>30% fat,<br>20 g heavy cream 38% fat,<br>9 ml olive oil,<br>40 g tomato.                                  |
| Modified Atkins diet<br><br>Kossoff, 2003<br><br>[3-5]  | 64% fat,<br>30% protein,<br>6% carbohydrate. | Limit carbohydrates to 10-15 grams a day.<br><br>No caloric and protein restriction.<br><br>Neither hospitalization, nor weighing individual food items required.                                | 1/4 cup heavy cream 38% fat,<br>omelette with butter,<br>slice of yellow cheese 28% fat,<br>four tablespoons of cream cheese 30% fat. |

\*Medium chain triglyceride (MCT) coconut-extracted oil thought to stimulate hepatic production of  $\beta$ -hydroxybutyrate ( $\beta$ -OHB) ketone bodies [6,7] was added at the dietician's discretion.

\*\*Data refer to % contribution to total caloric intake

Table S3.A- Baseline Demographics of adult population:

| patient # | Age | Sex | BMI  | Weight (kg) | Original Histology | Concomitant therapy | Metabolic intervention therapy                               |
|-----------|-----|-----|------|-------------|--------------------|---------------------|--------------------------------------------------------------|
| 1         | 62  | m   | 28.7 | 79          | GBM                | Bev + steroids      | <b>Cohort 1:</b><br>MAD alone                                |
| 2         | 61  | m   | 24.9 | 75.7        | GBM                | Bev                 |                                                              |
| 3         | 66  | f   | 32.6 | 78.4        | GBM                | -                   |                                                              |
| 4         | 61  | f   | 31.6 | 81          | AA                 | -                   | <b>Cohort 2:</b><br>MAD + Metformin 850mg twice-daily        |
| 5         | 58  | m   | 26.6 | 88          | GBM                | Rindopepimut        |                                                              |
| 6         | 57  | f   | 26   | 70          | AA                 | Steroids            |                                                              |
| 7         | 58  | m   | 31.9 | 103.4       | GBM                | Bev                 |                                                              |
| 8         | 62  | m   | 31.7 | 97          | GBM                | Tmz                 |                                                              |
| 9         | 58  | m   | 28.9 | 83.6        | GBM                | Tmz                 |                                                              |
| 10        | 74  | f   | 29.9 | 70          | GBM                | Tmz + steroids      |                                                              |
| 11        | 52  | f   | 24.1 | 67.9        | AA                 | Tmz                 | <b>Cohort 3:</b><br>MAD + Metformin 850 mg three-times daily |
| 12        | 66  | m   | 24.3 | 77.9        | GBM                | Tmz                 |                                                              |
| 13        | 63  | m   | 38.6 | 120         | GBM                | Tmz +steroids       |                                                              |

**Abbreviations:** AA- Anaplastic Astrocytoma Grade 3, GBM- Glioblastoma, Bev bevacizumab, Tmz- Temozolomide, MAD-modified Atkins diet.

\*For additional therapeutic details see [8]

Table S3.B - Baseline Demographics of children population:

| patient # | Age  | Sex | Height<br>(cm) | Weight<br>(kg) | Etiology             | Number of<br>antiepileptic<br>treatments | Diet type |
|-----------|------|-----|----------------|----------------|----------------------|------------------------------------------|-----------|
| 1         | 4    | f   | -              | 12.75          | Rett syndrome        | 3                                        | CKD       |
| 2         | 4.5  | f   | 103            | 19.5           | CMV                  | 3                                        | CKD       |
| 3         | 1.7  | m   | 98.5           | 9.2            | GPI Deficiency       | 3                                        | CKD       |
| 4         | 11.4 | m   | 136            | 30.3           | Unknown              | 2                                        | CKD/MAD   |
| 5         | 3.8  | m   | 92.5           | 13.7           | Unknown              | 0                                        | CKD/MAD   |
| 6         | 1.8  | f   | 78             | 8.4            | PDHA                 | 4                                        | CKD       |
| 7         | 0.8  | f   | 72             | 8              | SCN2A mutation       | 0                                        | CKD       |
| 8         | 2.7  | f   | 80             | 10             | GLUT1DS              | 1                                        | CKD/MAD   |
| 9         | 3.8  | m   | -              | 15.5           | Unknown              | 1                                        | CKD       |
| 10        | 1.4  | f   | -              | 7.2            | Asphyxia             | 3                                        | CKD       |
| 11        | 1.0  | m   | -              | 9.4            | Asphyxia             | 3                                        | CKD       |
| 12        | 0.4  | m   | -              | -              | KCNQ2 mutation       | 2                                        | CKD       |
| 13        | 8.5  | f   | -              | -              | Unknown              | 3                                        | MAD       |
| 14        | 2.3  | f   | --             | 11.4           | Chronic encephalitis | 3                                        | CKD       |
| 15        | 2.0  | m   | 83             | 11.1           | KCNQ2 mutation       | 4                                        | CKD       |

**Abbreviations:** CMV-Cytomegalovirus, GPI -Glucose-6-phosphate isomerase, GLUT1DS- GLUT1 deficiency syndrome, PDHD- pyruvate de hydrogenase deficiency, CKD -classical ketogenic diet, MAD-modified Atkins diet.

Table S4- Dietary intake of the two populations prior to and during diet intervention:

| Population |               | Prior to diet (%)* | After 1 month on diet (%) | p value  |
|------------|---------------|--------------------|---------------------------|----------|
| Children   | Carbohydrates | 51.7 ± 8.2         | 4.1 ± 2.0                 | <0.00001 |
|            | Fats          | 35.8 ± 6.5         | 88.7 ± 2.3                | <0.00001 |
| Adults     | Carbohydrates | 30.5 ± 3.7         | 5.7±0.5                   | 0.0001   |
|            | Fats          | 49.2±15.5          | 73.8±9.4                  | 0.0025   |

\*Data refer to % contribution to total caloric intake

Table S5: Anthropometric and metabolic parameters at baseline (week 0) and during treatment (weeks 2-4).

| population      | Metabolite | Units             | Mean - Baseline | Mean- During treatment | p value |
|-----------------|------------|-------------------|-----------------|------------------------|---------|
| <b>Adults</b>   | Weight     | kg                | 85.1            | 84.4                   | 0.4     |
|                 | BMI        | kg/m <sup>2</sup> | 29.48           | 29.16                  | 0.3     |
|                 | Glucose    | mg/dl             | 99.8            | 96.2                   | 0.4     |
|                 | HbA1C      | %                 | 5.6             | 5.4                    | 0.2     |
|                 | Insulin    | mU/l              | 14              | 11.4                   | 0.2     |
|                 | C peptide  | µg/l              | 2.97            | 2.76                   | 0.5     |
|                 | β-OHB      | mmol/l            | 0.09            | 0.59                   | 0.006   |
| <b>Children</b> | Weight     | kg                | 10.8            | 11.2                   | 0.014   |
|                 | β-OHB      | mmol/l            | 0.15            | 3.4                    | <0.0001 |

**Abbreviations:** BMI Body Mass Index, HbA1C Hemoglobin A1C, β-OHB β-hydroxybutyrate.

Additional details of anthropometric and metabolic parameters in the adult population are provided in reference [8].



Table S6.A- Clinical experience of dietary ketogenesis in healthy adults

| Type of diet inducing ketosis                                                         | Population studied                                                                                | n  | Achieved ketone levels                                                                                            | Effect of age                                                                                                                                                             | Additional Outcomes                                                                                                        | Reference |
|---------------------------------------------------------------------------------------|---------------------------------------------------------------------------------------------------|----|-------------------------------------------------------------------------------------------------------------------|---------------------------------------------------------------------------------------------------------------------------------------------------------------------------|----------------------------------------------------------------------------------------------------------------------------|-----------|
| Hypertriglyceridemic clamp (primed infusion of a long-chain triacylglycerol emulsion) | Ten healthy elderly men (70–78 y) and 10 healthy young men (19–45 y)                              | 20 | Plasma $\beta$ -OHB levels were at the range of 0.6–0.8 Mm/L, versus 0.4–0.6 m/L during infusion                  | In the basal state Plasma $\beta$ -OHB levels were higher in the elderly than in the young subjects and were increased in a similar manner in both groups during infusion | Plasma lipoprotein lipase activity was almost three times higher in the young than in the elderly subjects ( $P < 0.001$ ) | [9]       |
| Ketogenic meal (4.5:1 ratio), 90% fat containing MCT                                  | Healthy subjects in three age groups (76 y, n=11 vs 50 y n=12, or 23 y n=9)                       | 32 | Plasma $\beta$ -OHB levels were at the range of 0.5–1.5 Mm/l                                                      | There was no difference in Plasma $\beta$ -OHB levels during the 6 h after KD meal between the three groups                                                               | There was no difference in cumulative $^{13}\text{C}$ - $\beta$ -OHB oxidation between the three groups                    | [10]      |
| After 6 hours fasting                                                                 | Twenty healthy young adults (mean age, 26 years) and 24 healthy older adults (mean age, 74 years) | 44 | Plasma $\beta$ -OHB levels were $0.32 \pm 0.26$ mM in the young group versus $0.21 \pm 0.1$ mM in the adult group | The difference in Plasma $\beta$ -OHB levels between the two groups was not examined in this study                                                                        | Rate constants of AcAc ( $K_a$ ) in the brain were significantly lower in older adults compared with younger adults        | [11]      |
| Flaxseed oil supplement                                                               | Ten healthy young ( $25 \pm 0.9$ years) and 10 older adults ( $73.1 \pm 2.2$ years)               | 20 | Plasma $\beta$ -OHB levels were $1.27 \pm 55$ mM versus $128 \pm 30$ after consuming flaxseed oil supplement      | Postprandial production of $\beta$ -OHB was increased by 26% ( $P = 0.037$ ) only in the young adult group                                                                | The ratio of plasma fasting b-HB or AcAc to NEFA was higher in the young adult group                                       | [12]      |

**Abbreviations:** MCT; medium chain triglyceride,  $\beta$ -OHB;  $\beta$ -hydroxybutyrate, KD; ketogenic diet. NEFA; Non-esterified Free Fatty Acid.

Table S6.B- Clinical experience of dietary ketogenesis in adults with epilepsy or diabetes

| Type of diet inducing ketosis                                                     | Population studied                                     | n   | Achieved ketone levels                                                                                                                                                                                               | Additional Outcomes                                                                          | Reference |
|-----------------------------------------------------------------------------------|--------------------------------------------------------|-----|----------------------------------------------------------------------------------------------------------------------------------------------------------------------------------------------------------------------|----------------------------------------------------------------------------------------------|-----------|
| Low carbohydrate diet (less than 30 grams per day) to achieve nutritional ketosis | Patients with a mean age of 53.75 with type 2 diabetes | 262 | Plasma $\beta$ -OHB levels were increased from baseline ( $0.17 \pm 0.01$ mmol L to $0.54 \pm 0.04$ mmol L) within 70 days, followed by a decrease at 1 year ( $0.30 \pm 0.02$ mmol L), amongst 83% of participants. | Significantly reduce in HbA1c, medication use, and weight within 70 days, and through 1 year | [13]      |
| Classic KD via gastrostomy tube                                                   | Patients 18 to 80 years of age with SRSE               | 15  | All patients reached ketosis (defined as urine acetoacetate $\geq 40$ mg/dL and/or serum $\beta$ -OHB $\geq 2$ mmol/L) in a median of 2 days after KD initiation.<br><br>Not mentioned specific levels               | SRSE stopped in 73% of patients, within 1 week of KD initiation.                             | [14]      |

**Abbreviations:** SRSE; super refractory status epilepticus  $\beta$ -OHB;  $\beta$ -hydroxybutyrate, KD; ketogenic diet, HbA1c; Hemoglobin A1c.

Table S6.C-Clinical experience of dietary ketogenesis in adults with cancer

| Type of diet inducing ketosis                                    | Population studied                                                                      | n  | Achieved ketone levels                                                                                                                                               | Additional Outcomes                                                                                                                                                                                                                                        | Reference |
|------------------------------------------------------------------|-----------------------------------------------------------------------------------------|----|----------------------------------------------------------------------------------------------------------------------------------------------------------------------|------------------------------------------------------------------------------------------------------------------------------------------------------------------------------------------------------------------------------------------------------------|-----------|
| MAD (20-40g of CHO a day, Unlimited calories) for 16 weeks.      | Advanced cancer patients (42–87 years) who were not on chemotherapy (1 with GBM grad 4) | 17 | Seven out of 10 patients (70 %) achieved a ketone levels of 0.28–0.96mM, with 4 patients (36 %) achieving values between 0.96 to 4.13 mM and only 2 were non-ketotic | Clinical response did not correlate with ketosis or glycemia                                                                                                                                                                                               | [15]      |
| The CHO intake was targeted at no higher than 5% of total energy | Advanced cancers, mixed patients (52-73 years)                                          | 10 | Blood ketone levels ranged between 0.5-1.5 Mm                                                                                                                        | The extent of ketosis correlated with stable disease however, did not correlated with changes in weight loss, percentage of calorie deficit, CHO intake, total energy intake, CHO (kcal)/total energy intake, or CHO (kcal)/predicted energy requirements. | [16]      |
| Less than 70 g CHO per day                                       | Advanced cancers, mixed patients (30-65 years)                                          | 16 | Ketone levels were not measured in blood.<br><br>Ketosis in urine was achieved in 3 of patients at range between 1.5-4 Mm/l.                                         |                                                                                                                                                                                                                                                            | [17]      |
| A low-carbohydrate, ketogenic diet containing plant oils         | Recurrent glioma patients (30-72 years)                                                 | 19 | Ketone levels were not measured in blood.<br><br>ketosis in urine was achieved in 12/13 of patients at range between 0.3-1.0 mM/l                                    |                                                                                                                                                                                                                                                            | [18]      |

**Abbreviations:** MAD; modified Atkins diet, GBM; glioblastoma, CHO; carbohydrate

Table S6.D- Preclinical studies of dietary/fasting ketogenesis in young vs adult rats

| Animal Model                           | Age                                                      | Method of inducing ketosis                                                       | Achieved Ketone levels                                                                                                                                                                | Effect of age                                                                                                                                      | Additional outcomes                                                                                                                                                       | Reference |
|----------------------------------------|----------------------------------------------------------|----------------------------------------------------------------------------------|---------------------------------------------------------------------------------------------------------------------------------------------------------------------------------------|----------------------------------------------------------------------------------------------------------------------------------------------------|---------------------------------------------------------------------------------------------------------------------------------------------------------------------------|-----------|
| Wistar rats with seizures              | Adults and young rats                                    | Fed either a 4:1 ratio ketogenic diet (KD) or a 6.3:1 ratio KD                   | $\beta$ -OHB levels ranged between 0.5-1.0 mM in the young group versus 3.0-5.0 mM in the older group                                                                                 | In adult rats, not like in young rats, $\beta$ -OHB levels did not increase into the 2- 4-mM range, perceived to be the “therapeutic range” humans | The 4:1 KD—which did not elevate threshold doses—was able to elevate $\beta$ -OHB levels even higher than the 6.3:1 KD                                                    | [19]      |
| Normal vs streptozotocin diabetic rats | Adult rats (50-week-old) vs young rats (8-week-old)      | A 36h fasting period                                                             | $\beta$ -OHB levels were $1.29 \pm 15$ mM and $3.44 \pm 98$ mM (fed vs fasting state respectively) in the young group versus $1.10 \pm 24$ mM and $3.03 \pm 55$ mM in the older group | Fasting AcAc levels in adult rats were significantly lower than that in young rats; no significant difference observed in $\beta$ -OHB levels      | Total plasma total carnitine tended to decrease with aging. the plasma levels of FFA and glucagon in fasted adult rats were significantly higher than those in young rat. | [20]      |
| Sprague–Dawley rats with seizures      | Adults and young rats of the ages 22-126 days post-natal | Fed a calorie-restricted ketogenic diet (more than 78% of its calories from fat) | The mean Ketone levels were 7 mM in the 22 days group versus 0.5 mM in the 126 days group                                                                                             | The blood level of $\beta$ -OHB in the younger rats was significantly higher than that of the older rates                                          | Ketogenic animals that began the diet at 126 days exhibited no significant elevation in $\beta$ -OHB compared to controls (normal diet)                                   | [21]      |

**Abbreviations:** ACAC; Acetylacetone,  $\beta$ -OHB;  $\beta$ -hydroxybutyrate, FFA; free fatty acid, KD; ketogenic diet.

## References for supplementary material

- .1 Zupec-Kania, B.A.; Spellman, E. An overview of the ketogenic diet for pediatric epilepsy. *Nutr Clin Pract* **2008**, *23*, 589-596.
- .2 Wilder, R. In *The effects of ketonemia on the course of epilepsy*, Mayo Clin Proc, 1921; pp 307-308.
- .3 Kossoff, E.H.; Dorward, J.L. The modified atkins diet. *Epilepsia* **2008**, *49 Suppl 8*, 37-41.
- .4 Sharma, S.; Sankhyan, N.; Gulati, S.; Agarwala, A. Use of the modified atkins diet for treatment of refractory childhood epilepsy: A randomized controlled trial. *Epilepsia* **2013**, *54*, 4.81-486
- .5 Kossoff, E.H.; Cervenka, M.C.; Henry, B.J.; Haney, C.A.; Turner, Z. A decade of the modified atkins diet (2003-2013): Results, insights, and future directions. *Epilepsy Behav* **2013**, *29*, 437-442.
- .6 Liu, Y.-M.; Wang, H.-S. Medium-chain triglyceride ketogenic diet, an effective treatment for drug-resistant epilepsy and a comparison with other ketogenic diets. *Biomed J* **2013**, *36*, 9-15.
- .7 Seaton, T.B.; Welle, S.L.; Warenko, M.K.; Campbell, R.G. Thermic effect of medium-chain and long-chain triglycerides in man. *The American Journal of Clinical Nutrition* **1986**, *44*, 630-634.
- .8 Porper, K.; Shpatz, Y.; Plotkin, L.; Pechthold, R.G.; Talianski, A.; Champ, C.E.; Furman, O.; Shimoni-Sebag, A.; Symon, Z.; Amit, U., *et al.* A phase i clinical trial of dose-escalated metabolic therapy combined with concomitant radiation therapy in high-grade glioma. *J Neurooncol* **2021**, *153*, 487-496.
- .9 Åberg, W.; Thörne, A.; Olivecrona, T.; Nordenström, J. Fat oxidation and plasma removal capacity of an intravenous fat emulsion in elderly and young men. *Nutrition* **2006**, *22*, 738-743.
- .10 Freemantle, E.; Vandal, M.; Tremblay-Mercier, J.; Plourde, M.; Poirier, J.; Cunnane, S. Metabolic response to a ketogenic breakfast in the healthy elderly. *JNHA-The Journal of Nutrition, Health and Aging* **2009**, *13*, 293-298.
- .11 Nugent, S.; Tremblay, S.; Chen, K.W.; Ayutyanont, N.; Roontiva, A.; Castellano, C.-A.; Fortier, M.; Roy, M.; Courchesne-Loyer, A.; Bocti, C. Brain glucose and acetoacetate metabolism: A comparison of young and older adults. *Neurobiology of aging* **2014**, *35*, 1386-1395.
- .12 Hennebelle, M.; Courchesne-Loyer, A.; St-Pierre, V.; Vandenberghe, C.; Castellano, C.-A.; Fortier, M.; Tessier, D.; Cunnane, S.C. Preliminary evaluation of a differential effect of an  $\alpha$ -linolenate-rich supplement on ketogenesis and plasma  $\omega$ -3 fatty acids in young and older adults. *Nutrition* **2016**, *32*, 1211-1216.
- .13 Hallberg, S.J.; McKenzie, A.L.; Williams, P.T.; Bhanpuri, N.H.; Peters, A.L.; Campbell, W.W.; Hazbun, T.L.; Volk, B.M.; McCarter, J.P.; Phinney, S.D. Effectiveness and safety of a novel care model for the management of type 2 diabetes at 1 year: An open-label, non-randomized, controlled study. *Diabetes Therapy* **2018**, *9*, 583-612.
- .14 Cervenka, M.C.; Hocker, S.; Koenig, M.; Bar, B.; Henry-Barron, B.; Kossoff, E.H.; Hartman, A.L.; Probasco, J.C.; Benavides, D.R.; Venkatesan, A. Phase i/ii multicenter ketogenic diet study for adult superrefractory status epilepticus. *Neurology* **2017**, 10.1212/WNL.0000000000003690.
- .15 Tan-Shalaby, J.L.; Carrick, J.; Edinger, K.; Genovese, D.; Liman, A.D.; Passero, V.A.; Shah, R.B. Modified atkins diet in advanced malignancies-final results of a safety and feasibility trial within the veterans affairs pittsburgh healthcare system. *Nutrition & metabolism* **2016**, *13*, 52.
- .16 Fine, E.J.; Segal-Isaacson, C.; Feinman, R.D.; Herszkopf, S.; Romano, M.C.; Tomuta, N.; Bontempo, A.F.; Negassa, A.; Sparano, J.A. Targeting insulin inhibition as a

- metabolic therapy in advanced cancer: A pilot safety and feasibility dietary trial in 10 patients. *Nutrition* **2012**, *28*, 1028-1035.
- .17 Schmidt, M.; Pfetzer, N.; Schwab, M.; Strauss, I.; Kämmerer, U. Effects of a ketogenic diet on the quality of life in 16 patients with advanced cancer: A pilot trial. *Nutrition & metabolism* **2011**, *8*, 54.
- .18 Rieger, J.; Bähr, O.; Maurer, G.D.; Hattingen, E.; Franz, K.; Brucker, D.; Walenta, S.; Kämmerer, U.; Coy, J.F.; Weller, M. Ergo: A pilot study of ketogenic diet in recurrent glioblastoma. Erratum in/ijo/45/6/2605. *International journal of oncology* **2014**, *44*, .1843-1852
- .19 Nylen, K.; Likhodii, S.; Abdelmalik, P.A.; Clarke, J.; Burnham, W.M. A comparison of the ability of a 4:1 ketogenic diet and a 6.3:1 ketogenic diet to elevate seizure thresholds in adult and young rats. *Epilepsia* **2005**, *46*, 1198-1204.
- .20 Okuda, Y.; Kawai, K.; Yamashita, K. Age-related change in ketone body metabolism: Diminished glucagon effect on ketogenesis in adult rats\*. *Endocrinology* **1987**, *120*, 2152-2157.
- .21 Bough, K.J.; Valiyil, R.; Han, F.T.; Eagles, D.A. Seizure resistance is dependent upon age and calorie restriction in rats fed a ketogenic diet. *Epilepsy research* **1999**, *35*, 21-28.
